# On the structure of neuronal population activity under fluctuations in attentional state

Alexander S. Ecker<sup>1,2,3,4,@</sup>, George H. Denfield<sup>4</sup>,  
Matthias Bethge<sup>1,2,3,\*</sup>, and Andreas S. Tolias<sup>3,4,5,\*</sup>

<sup>1</sup>Centre for Integrative Neuroscience and Institute for Theoretical Physics,  
University of Tübingen, Germany

<sup>2</sup>Max Planck Institute for Biological Cybernetics, Tübingen, Germany

<sup>3</sup>Bernstein Centre for Computational Neuroscience, Tübingen, Germany

<sup>4</sup>Department of Neuroscience, Baylor College of Medicine, Houston, TX, USA

<sup>5</sup>Department of Computational and Applied Mathematics, Rice University,  
Houston, TX, USA

@Corresponding author: [alexander.ecker@uni-tuebingen.de](mailto:alexander.ecker@uni-tuebingen.de)

\*These authors contributed equally

May 22, 2015

## Abstract

1 Attention is commonly thought to improve behavioral performance by increasing response gain and  
2 suppressing shared variability in neuronal populations. However, both the focus and the strength  
3 of attention are likely to vary from one experimental trial to the next, thereby inducing response  
4 variability unknown to the experimenter. Here we study analytically how fluctuations in attentional  
5 state affect the structure of population responses in a simple model of spatial and feature attention.  
6 In our model, attention acts on the neural response exclusively by modulating each neuron's gain.  
7 Neurons are conditionally independent given the stimulus and the attentional gain, and correlated  
8 activity arises only from trial-to-trial fluctuations of the attentional state, which are unknown  
9 to the experimenter. We find that this simple model can readily explain many aspects of neural  
10 response modulation under attention, such as increased response gain, reduced individual and  
11 shared variability, increased correlations with firing rates, limited range correlations, and differential  
12 correlations. We therefore suggest that attention may act primarily by increasing response gain  
13 of individual neurons without affecting their correlation structure. The experimentally observed  
14 reduction in correlations may instead result from reduced variability of the attentional gain when  
15 a stimulus is attended. Moreover, we show that attentional gain fluctuations – even if unknown  
16 to a downstream readout – do not impair the readout accuracy despite inducing limited-range  
17 correlations.  
18

## 1 Introduction

Attention was traditionally thought of as acting by increasing response gain of a relevant population of neurons (Maunsell and Treue 2006; Reynolds and Chelazzi 2004). More recent studies found that attention also reduces pairwise correlations between neurons (Cohen and Maunsell 2009; Herrero et al. 2013; Mitchell et al. 2009). Based on a simple pooling model (Zohary et al. 1994) these authors argued that the effects of increased gain are dwarfed by the effects of reduced correlations and, therefore, attention is more appropriately viewed as shaping the noise distribution.

However, in an experiment the subject’s state of attention can be controlled only indirectly and is bound to vary from one trial to the next. As a consequence, measuring neuronal variability or correlations under attention has a fundamental caveat: it is unclear to what extent the observed neuronal covariability reflects interesting aspects of information processing in the neuronal population or simply trial-to-trial fluctuations in the subject’s state of attention, which is unknown to the experimenter. Despite ample evidence that attention fluctuates from trial to trial (Cohen and Maunsell 2010; Cohen and Maunsell 2011), the effects of such fluctuations on neuronal population activity have so far not been investigated.

Here we analyze a simple neural population model, where neurons with overlapping receptive fields encode the direction of motion of a stimulus (Fig. 1A). We assume that neurons produce spikes independently according to a Poisson process with rate  $\lambda_i$  and treat attention as a process that modulates the neurons’ gain (Fig. 1B). The firing rates are given by

$$\lambda_i = g_i f_i(\theta), \tag{1}$$

where  $g_i$  is the attentional gain (a combination of spatial and feature attention) and  $f_i(\theta)$  is the direction tuning curve of neuron  $i$ . We assume that there is always a stimulus in the neurons’ receptive field, but this stimulus is not necessarily attended. Crucially, in our model the subject’s attentional state is not constant across trials, even within the same attentional condition. Thus,  $g_i$  is a random variable that varies from trial to trial (Fig. 1C), and its precise value is unknown to the experimenter. As a consequence, the correlations in  $g_i$  across neurons will induce correlations between the observed neural responses.

In the following sections, we analyze this correlation structure in detail. We find that the correlations induced by attentional fluctuations resemble many experimentally observed aspects of correlated variability, such as correlations that increase with firing rates, limited range correlations, and differential correlations. In addition, we investigate the consequences of correlations induced by fluctuating attentional gain for reading out the direction of motion of the stimulus from the population response. We show that such correlations do not impair readout, even if the decoder does not have access to the attentional state.

Our results have been presented previously in abstract form (Ecker et al. 2012). Some of the ideas presented in this paper have recently been developed independently by another group (Rabinowitz et al. 2015).

## 2 Methods

This section contains a detailed description of the model and the derivations of the main results. In an effort to make the paper as accessible as possible, the results section is self-contained. Readers not interested in the detailed derivations can skip ahead directly to the results section on page 8.

### 2.1 Model setup

We model a population of direction-selective neurons with overlapping receptive fields and a diverse range of preferred directions  $\phi_i$ . We use a simple model of spatial and feature attention, where a neuron's firing rate  $\lambda_i$  is the product of an attentional gain  $g_i(\psi)$  and a tuning function  $f_i(\theta)$ :

$$\lambda_i(\theta, \psi) = g_i(\psi)f_i(\theta) \quad (2)$$

Here,  $\psi$  is the attended direction of motion and  $\theta$  the direction of the stimulus that is shown. Neurons are assumed to be conditionally independent given the firing rate  $\lambda_i$  (i.e. no noise correlations). The attentional gain depends on whether attention is directed to the location of the neurons' receptive fields and on the attended direction of motion. For spatial attention, we use  $g_i = \alpha$ , which is the same for all neurons, since they all have overlapping receptive fields. For feature attention we use  $g_i(\psi) = 1 + \beta h(\psi - \phi_i)$ , where  $\beta$  the *feature attention gain*, and  $h(\cdot)$  the *gain profile*. We follow the feature similarity gain model (Treue and Martinez-Trujillo 1999), where a neuron's gain is enhanced if the attended feature matches the neuron's preference and suppressed otherwise. A common choice for  $h$  is a cosine:  $h(\psi - \phi_i) = \cos(\psi - \phi_i)$ .

Note that from the perspective of the model there is no fundamental difference between spatial and feature attention. If we treat space as a variable that is being encoded by the population, any derivations for feature attention also apply to spatial attention. However, because we consider only a local population with overlapping receptive fields, spatial attention is a special case: the gain profile within the population is constant and therefore spatial attention can be expressed in a simpler way using a single common gain  $\alpha$ . Thus, whenever we refer to spatial attention, this applies to a situation where all neurons in the population that is being considered share the same preferred feature. Likewise, whenever we refer to feature attention, this applies to any situation where the neurons in the population span a large range of preferred features. We chose this (somewhat arbitrary) distinction, because it reflects the typical situation in an experiment, where neurons with similar retinotopic locations are recorded, which typically span a large range of preferred orientations or directions.

### 2.2 Effect of fluctuating gains on spike count statistics

Throughout this paper we assume that spatial and feature attention are independent processes and consider them in isolation. We further assume that the experimenter does not have access to the attentional state on individual trials, but can only control its average over many trials:

$$E[\alpha] = \mu \quad (3)$$

$$E[\beta] = \nu. \quad (4)$$

In addition the attentional state fluctuates from trial to trial with unknown variance

$$\text{Var}[\alpha] = \sigma^2 \quad (5)$$

$$\text{Var}[\beta] = \tau^2. \quad (6)$$

85 To compute means and (co-)variances of the observed spike counts we need only the means and  
 86 variances of  $\alpha$  and  $\beta$ . The expected spike counts (Eqs. 31, 37) follow from the linearity of the ex-  
 87 pectation. Variances and covariances can be computed by application of the Law of Total Variance  
 88 (here for the case of spatial attention, feature attention follows the same logic):

$$\text{Cov}[y_i, y_j] = \text{E}[\text{Cov}[y_i, y_j|\alpha]] + \text{Cov}[\text{E}[y_i|\alpha], \text{E}[y_j|\alpha]], \quad (7)$$

89 where the outer expectation (covariance) is taken over  $\alpha$  and the inner covariance (expectation)  
 90 over  $y_i$  and  $y_j$ . Plugging the definitions of  $\lambda_i = \text{E}[y_i|\alpha]$  and using the assumption of conditionally  
 91 independent Poisson spiking  $\text{Cov}[y_i, y_j|\alpha] = \delta_{ij}\lambda_i$ , we obtain the expressions for variances and  
 92 covariances stated in the Results (Eqs. 32–34, 38–41).

### 93 2.3 Effect of fluctuations in attended feature on spike count statistics

94 Calculating the means and covariances under fluctuations in the attended direction  $\psi$  follows the  
 95 same approach as above. However, since the gain profile  $h_i(\psi)$  can be non-linear, we need a few  
 96 additional assumptions. We assume that  $\psi$  is distributed around some direction  $\psi_0 = \text{E}[\psi]$  with  
 97 variance  $q^2 = \text{Var}[\psi]$ . For reasonably small  $q^2$  we can approximate the gain profile by its first-order  
 98 Taylor expansion

$$h_i(\psi) \approx h_i(\psi_0) + (\psi - \psi_0)h'_i(\psi_0), \quad (8)$$

99 where  $h'_i$  is the derivative with respect to  $\psi$ . Using this approximation we can write  $\text{E}[h_i(\psi)] \approx$   
 100  $h_i(\psi_0)$  and  $\text{Var}[h_i(\psi)] \approx q^2 h'_i(\psi_0)$ , which leads (again after applying the Law of Total Variance) to  
 101 the results in Eqs. 42–44.

### 102 2.4 Coding accuracy under fluctuations of spatial attention

103 Here we show that fluctuations in spatial attention have a negligible effect on the amount of  
 104 information about the orientation of the stimulus. For simplicity we assume that neurons produce  
 105 spikes conditionally independently given the stimulus orientation  $\theta$  and the attentional gain  $g$ :

$$y_i|\theta, g \sim \text{Poisson}(\lambda_i) \quad \lambda_i = g f_i(\theta) \quad (9)$$

The attentional gain  $g$  is shared among all neurons and drawn from a Gamma distribution with  
 shape  $\mu^2/\sigma^2$  and scale  $\sigma^2/\mu$ , which implies  $\text{E}[g] = \mu$  and  $\text{Var}[g] = \sigma^2$ . Assuming that the experi-  
 menter does not know the attentional gain, the distribution  $P(\mathbf{y}|\theta)$  obtained by marginalizing over  
 $g$  is a multivariate negative binomial distribution:

$$P(\mathbf{y}|\theta) = \int P(g) \prod_i P(y_i|\theta, g) dg \quad (10)$$

$$= \int \frac{g^{\frac{\mu^2}{\sigma^2}-1} \exp(-\frac{g\mu}{\sigma^2})}{\Gamma\left(\frac{\mu^2}{\sigma^2}\right) \left(\frac{\sigma^2}{\mu}\right)^{\frac{\mu^2}{\sigma^2}}} \prod_i \frac{(g f_i)^{y_i}}{y_i!} \exp(-g f_i) dg \quad (11)$$

$$= \frac{\left(\frac{\mu}{\sigma^2}\right)^{\frac{\mu^2}{\sigma^2}}}{\Gamma\left(\frac{\mu^2}{\sigma^2}\right)} \left(\prod_i \frac{f_i^{y_i}}{y_i!}\right) \int g^{\frac{\mu^2}{\sigma^2}-1+\sum y_i} \exp\left(-g\left(\frac{\mu}{\sigma^2} + \sum f_i\right)\right) dg \quad (12)$$

$$= \frac{\Gamma\left(\frac{\mu^2}{\sigma^2} + \sum y_i\right)}{\Gamma\left(\frac{\mu^2}{\sigma^2}\right)} \left(\prod_i \frac{f_i^{y_i}}{y_i!}\right) \left(\frac{\mu}{\sigma^2} + \sum f_i\right)^{\frac{\mu^2}{\sigma^2}} \left(\frac{1}{\frac{\mu}{\sigma^2} + \sum f_i}\right)^{\sum y_i} \quad (13)$$

For the Fisher information  $J = \mathbb{E}\left[\frac{d^2}{d\theta^2} \log P(\mathbf{y}|\theta)\right]$  we need the derivatives of the log-likelihood:

$$\frac{d}{d\theta} \log P(\mathbf{y}|\theta) = \left( \sum_i \frac{y_i f'_i}{f_i} \right) - \frac{\left( \frac{\mu^2}{\sigma^2} + \sum y_i \right) \sum f'_i}{\frac{\mu}{\sigma^2} + \sum f_i} \quad (14)$$

$$\frac{d^2}{d\theta^2} \log P(\mathbf{y}|\theta) = \left( \sum_i y_i \frac{f''_i f_i - (f'_i)^2}{f_i^2} \right) - \left( \frac{\mu^2}{\sigma^2} + \sum y_i \right) \frac{(\sum f''_i) \left( \frac{\mu}{\sigma^2} + \sum f_i \right) - (\sum f'_i)^2}{\left( \frac{\mu}{\sigma^2} + \sum f_i \right)^2} \quad (15)$$

Plugging into the formula for Fisher information, re-ordering the summations over  $\mathbf{y}$  and  $i$ , and using the facts  $\sum_{\mathbf{y}} P(\mathbf{y}|\theta) = 1$  and  $\sum_{\mathbf{y}} P(\mathbf{y}|\theta) y_i = \mathbb{E}[y_i] = \mu f_i$ , we obtain

$$J = - \sum_{\mathbf{y}} P(\mathbf{y}|\theta) \left[ \left( \sum_i y_i \frac{f''_i f_i - (f'_i)^2}{f_i^2} \right) - \left( \frac{\mu^2}{\sigma^2} + \sum y_i \right) \frac{(\sum f''_i) \left( \frac{\mu}{\sigma^2} + \sum f_i \right) - (\sum f'_i)^2}{\left( \frac{\mu}{\sigma^2} + \sum f_i \right)^2} \right] \quad (16)$$

$$= \mu \sum_i \frac{(f'_i)^2}{f_i} - \frac{\mu (\sum f'_i)^2}{\frac{\mu}{\sigma^2} + \sum f_i} \quad (17)$$

106 The first term in the above equation is the Fisher information of an independent population of  
 107 neurons and therefore  $O(N)$ , while the second term is  $O(1)$ : for homogeneous population of neurons,  
 108 where  $f_i(\theta) = f(\theta - \phi_i)$ , it is zero; for heterogeneous populations it is  $O(1)$ , as we show in the  
 109 next paragraph. Thus, fluctuations in spatial attention do not impair the coding accuracy of the  
 110 population with respect to orientation.

111 To show that the second term above is  $O(1)$  for heterogeneous populations, we assume that  
 112 the neurons' tuning curves are independent random variables (see Ecker et al. 2011; Shamir and  
 113 Sompolinsky 2006). In this case the quantity of interest is the expected value with respect to  
 114 different realizations of the heterogeneity:

$$\mathbb{E} \left[ \frac{\mu (\sum f'_i)^2}{\frac{\mu}{\sigma^2} + \sum f_i} \right] \approx \frac{\mu \mathbb{E}[(\sum f'_i)^2]}{\frac{\mu}{\sigma^2} + \mathbb{E}[\sum f_i]} = O(1). \quad (18)$$

115 Here the approximation holds because for large  $N$  the width of the distribution of  $\sum f_i$  becomes  
 116 narrower relative to its mean and therefore the expected value of the second term converges to the  
 117 ratio of the expected values of numerator and denominator. The equality holds because  $\sum f_i =$   
 118  $O(N)$  and

$$\mathbb{E} \left[ (\sum f'_i)^2 \right] = \text{Var} \left[ \sum f'_i \right] = \sum \text{Var}[f'_i] = O(N), \quad (19)$$

119 which holds because  $\mathbb{E}[\sum f'_i] = 0$ .

## 120 2.5 Coding accuracy under fluctuations of feature attentional gain

121 Fluctuations in feature attention are more difficult to study analytically. Unfortunately, the Gamma-  
 122 Poisson mixture model employed above does not generalize to the case where the gain is weighted  
 123 differently for each neuron (i.e. the gain profile  $h_i$ ), or at least we are not aware of a model that  
 124 has a closed-form expression for the marginal probability mass function when the gain is unknown.  
 125 Therefore, we here approximate the population activity by a multivariate Gaussian distribution  
 126 with matching mean and covariance matrix (Eq. 37–41) and focus on linear readout. Under this  
 127 approximation, the (linear) Fisher Information is given by

$$J = (\mathbf{f}')^T C^{-1} \mathbf{f}' \quad (20)$$

128 The inverse of the covariance matrix is obtained by applying a rank-one update:

$$C^{-1} = F^{-1} - \frac{F^{-1}\mathbf{u}\mathbf{u}^T F^{-1}}{\tau^{-2} + \mathbf{u}^T F^{-1}\mathbf{u}}, \quad (21)$$

where  $F_{ii} = (1 + \nu h_i(\psi))f_i(\theta)$  and  $u_i = h_i(\psi)f_i(\theta)$  as above. Plugging in and simplifying we obtain

$$J = J_0 - \frac{\left(\sum \frac{h_i f_i'}{1 + \nu h_i}\right)^2}{\tau^{-2} + \sum \frac{h_i f_i}{1 + \nu h_i}} \quad (22)$$

$$= J_0 - O(1). \quad (23)$$

129 As above for spatial attention, the  $O(1)$  correction term is exactly zero for homogeneous populations  
130 and the derivation for heterogeneous populations follows the same line of argument as above.

## 131 2.6 Coding accuracy under fluctuations of attended feature

Fluctuations of the attended feature create differential correlations, i. e. response variability that is identical to variability induced by changes in the stimulus. Here we derive this result using a Generalized Linear Model formulation (see also Eqs. 52, 53 in Results):

$$\log \lambda_i = \beta \cos(\psi - \phi_i) + \kappa \cos(\theta - \phi_i) \quad (24)$$

$$= (\mathbf{b} + \kappa \mathbf{x})^T \mathbf{k}_i \quad (25)$$

$$\equiv \hat{\mathbf{x}}^T \mathbf{k}_i, \quad (26)$$

132 where  $\mathbf{b} = \beta[\cos \psi, \sin \psi]^T$ ,  $\mathbf{x} = [\cos \theta, \sin \theta]^T$ , and  $\mathbf{k}_i = [\cos \phi_i, \sin \phi_i]^T$ . Since  $\hat{\mathbf{x}}$  is independent of  
133 the neurons, it is obvious that attention has exactly the same effect as a change in the stimulus.  
134 Assuming  $E[\psi] = \theta$ ,  $\text{Var}[\psi]$  is small, and (without loss of generality)  $\theta = 0$ , we have

$$\mathbf{b} \approx \beta \begin{bmatrix} 1 \\ \psi \end{bmatrix}, \quad \mathbf{x} \approx \begin{bmatrix} 1 \\ 0 \end{bmatrix}. \quad (27)$$

135 Moreover, we can write the attention-perturbed stimulus  $\hat{\theta}$  as

$$\hat{\theta} \approx \frac{\hat{x}_2}{\hat{x}_1} = \frac{\psi}{\kappa + \beta}. \quad (28)$$

136 For large  $N$  the Poisson noise averages out and therefore the resulting Fisher information is simply  
137 the inverse of the variance of the (attention-perturbed) stimulus:

$$J \rightarrow \frac{1}{\text{Var}[\hat{\theta}]} = \frac{(\kappa/\beta + 1)^2}{\text{Var}[\psi]}. \quad (29)$$

## 138 2.7 Code

139 Figures were generated using Matlab R2014b (The Mathworks Inc.). The code to reproduce the  
140 figures is publicly available at <https://github.com/aecker/attentional-fluctuations>.

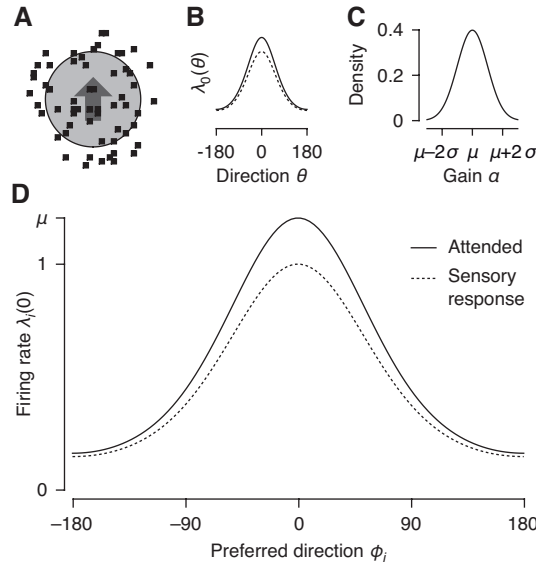

**Figure 1.** Model of spatial attention. **A.** Example stimulus. Neurons’ receptive fields are assumed to be at the same location (circle). **B.** Tuning curve under sensory stimulation (dashed) and with spatial attention directed to the stimulus in the receptive field (solid). **C.** Distribution of attentional gain ( $\alpha$ ). **D.** Population response of a homogeneous population of neurons under sensory stimulation (dashed) and with attention directed to the stimulus in the receptive fields (solid).

### 3 Results

#### 3.1 Fluctuations in spatial attention

Our goal is to characterize the effect of fluctuating attentional signals on the population response in sensory areas. We start by considering the simplest case of spatial attention and a common gain  $\alpha$  for all neurons (Fig. 1):

$$\lambda_i = \alpha f_i(\theta), \quad (30)$$

where  $\alpha > 0$  is the amount of spatial attention allocated to the stimulus in the neurons’ receptive field. We do not require any distributional assumptions on  $\alpha$ , except for its mean  $E[\alpha] = \mu$  and variance  $\text{Var}[\alpha] = \sigma^2$  (Fig. 1C). Under this model, the average spike count of a neuron is given by

$$E[y_i|\theta] = \mu f_i(\theta). \quad (31)$$

By convention we refer to the case of  $\mu = 1$  as the *sensory response*, which is the neural response to the stimulus in the absence of any attentional modulation. In experimental conditions where the stimulus is attended  $\mu_a > 1$  (Fig. 1D). When attention is directed towards a different stimulus  $\mu_u \leq 1$  (depending on whether responses are suppressed relative to the sensory response under such conditions). Note that although we use homogeneous neural populations in the figures (all neurons have the same tuning curve up to a preferred direction  $\phi_i$ , i.e.  $f_i(\theta) = f(\theta - \phi_i)$ ), all results hold more generally for arbitrary tuning curves.

Because the attentional state fluctuates from trial to trial, the underlying firing rate also fluctuates. By applying the law of total variance we obtain the spike count variance (Fig. 2A):

$$\text{Var}[y_i|\theta] = \mu f_i(\theta) + \sigma^2 f_i^2(\theta). \quad (32)$$

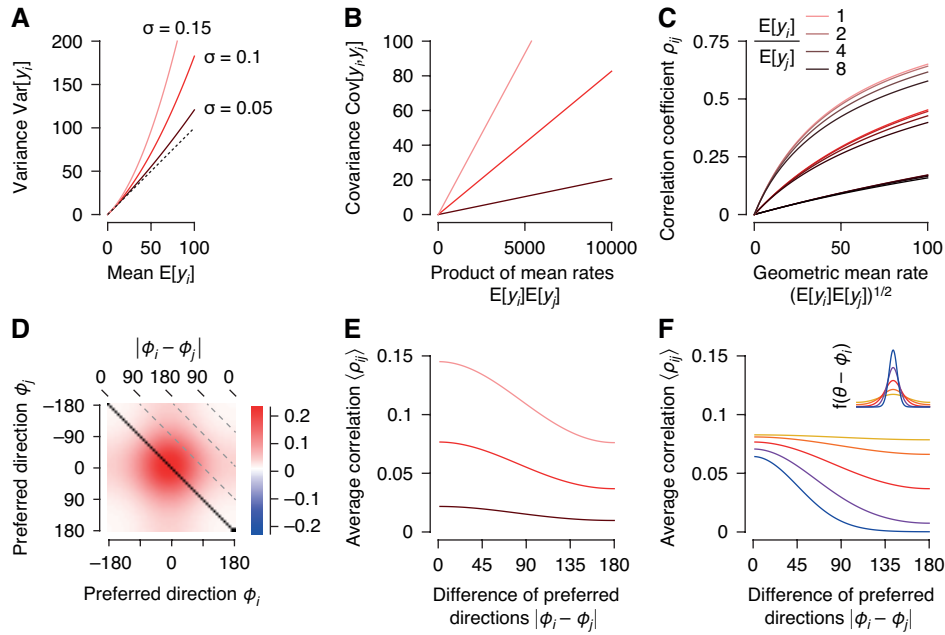

**Figure 2.** Effect of fluctuations in attentional state on spike count statistics. Solid lines: analytical solutions (Eqs. 31–35). Parameter values used here were  $\mu = 0.1$ ,  $\sigma \in \{0.05, 0.1, 0.15\}$  (dark to light red). **A.** Spike count variance as a function of mean spike count. Dashed line: identity (Poisson process). **B.** Covariance as a function of product of spike counts. **C.** Correlation coefficient as function of geometric mean firing rate. The three groups of lines correspond to different levels of  $\sigma$  as in the other panels. Darker colors within a group indicate increasing ratios  $f_i(\theta)/f_j(\theta)$ . **D.** Matrix of correlation coefficients for  $\theta = 0^\circ$  and  $\sigma = 0.1$ . Tuning curves:  $f_i(\theta) = \exp(\kappa \cos(\theta - \phi_i) + \epsilon)$ ,  $\kappa = 2$ , average firing rate across all  $\theta$ : 10 spikes/s. **E.** Average correlation coefficient (over all directions of motion  $\theta$ ) as a function of difference of the preferred directions of the two neurons. Despite a common gain for all neurons, correlations decay with tuning difference. Parameters as in panel E. **F.** As in panel E, but for different tuning widths ( $\kappa \in \{0.5, 1, 2, 4, 8\}$ , shown in inset at the top). The decay of the correlations with the difference of the preferred directions is stronger for narrow tuning curves. Red line corresponds to panels D and E. Mean firing rate: 10 spikes/s for all tuning widths.

158 The first term is equal to the average spike count and results from the Poisson process assumption,  
 159 while the second term is quadratic in the firing rate, which results from the multiplicative nature  
 160 of the fluctuating gain  $\alpha$  (Goris et al. 2014). Such an expanding mean-variance relation has been  
 161 observed in many experimental studies (Britten et al. 1993; Dean 1981; Goris et al. 2014; Tolhurst  
 162 et al. 1983). Note that if the attentional gain does not fluctuate, we recover the Poisson process.

163 Similar to the variances, we can compute the covariance between two neurons, which is given  
 164 by the product of the firing rates and the variance of the attentional gain (Fig. 2B):

$$\text{Cov}[y_i, y_j | \theta] = \sigma^2 f_i(\theta) f_j(\theta) \quad i \neq j. \quad (33)$$

165 Recall that neurons are assumed to be conditionally independent given the attentional gain. Thus,  
 166 any covariability arises exclusively from gain fluctuations. As a result, the covariance matrix  
 167 (Fig. 2D) can be expressed as a diagonal matrix plus a rank-one matrix:

$$C = \mu \text{Diag}(\mathbf{f}) + \sigma^2 \mathbf{f} \mathbf{f}^T. \quad (34)$$

168 Note that the assumption of conditional independence could be relaxed without affecting any of  
 169 the major results qualitatively: the diagonal matrix in the equation above would simply be replaced



170 by the (non-diagonal) point process covariance matrix.

171 Experimental studies more typically quantify spike count correlations rather than covariances.  
172 We therefore also calculated the correlation coefficient  $\rho_{ij}$  of two neurons (Fig. 2C):

$$\rho_{ij} = \sqrt{\frac{f_i f_j}{(\mu/\sigma^2 + f_i)(\mu/\sigma^2 + f_j)}} \quad (35)$$

173 The spike count correlations induced by a fluctuating attentional gain increase with firing rates  
174  $f_i(\theta)$ . This effect, which has also been observed in numerous experimental studies (Cohen and  
175 Maunsell 2009; Ecker et al. 2014; Mitchell et al. 2009; Smith and Sommer 2013), arises because  
176 the independent (Poisson) variability is linear in the firing rate, whereas the covariance induced  
177 by gain fluctuations is quadratic and therefore dominates for large firing rates. Thus, correlations  
178 increase with the geometric mean firing rate, but there is no simple one-to-one mapping between  
179 the two quantities (it also depends on the ratio of the firing rates, Fig. 2C). The covariance, in  
180 contrast, is proportional to the product of the firing rates with a constant of proportionality of  
181  $\sigma^2$  (Fig. 2B), suggesting that the latter might be more appropriate to consider when analyzing  
182 experimental data.

183 In addition, the correlation structure induced by gain fluctuations is non-trivial even if all  
184 neurons share the same gain (Fig. 2E, F; see also Ecker et al. (2014)). Due to the nonlinear shape  
185 of the tuning function and the nonlinear way the neurons' tuning functions affect spike count  
186 correlations, the correlations decrease with increased difference in two neurons' preferred directions  
187 (Fig. 2F). The slope of the decay depends mainly on the dynamic range of the tuning curve. If  
188 neurons have a high baseline firing rate compared to their peak firing rate, correlations decrease  
189 only marginally with preferred direction. In contrast, sharply tuned neurons with close to zero  
190 baseline firing rates exhibit strong limited-range structure.

191 This limited-range correlation structure has been observed in numerous experimental studies  
192 (Bair et al. 2001; Cohen and Maunsell 2009; Ecker et al. 2010; Smith and Kohn 2008; Zohary et al.  
193 1994) and has been hypothesized to reflect shared input among similarly tuned neurons. However,  
194 our simple model shows that these seemingly structured correlations can arise from a very simple,  
195 non-specific mechanism: a common fluctuating gain that drives all neurons equally, irrespective of  
196 their tuning properties.

### 197 3.2 Fluctuations of feature attention

198 Feature attention is different from spatial attention in that the sign of the gain modulation depends  
199 on the similarity of the attended direction to the neuron's preferred direction of motion (Fig. 3).  
200 Following the feature-similarity gain model (Treue and Martinez-Trujillo 1999), we model feature  
201 attention by

$$\lambda_i = (1 + \beta h_i(\psi)) f_i(\theta), \quad (36)$$

202 where  $\beta$  is the *feature gain* that controls how strongly the feature  $\psi$  (in this case direction of  
203 motion) is attended on the given trial and  $h_i(\psi)$  is the *gain profile* (Fig. 3B) that determines the  
204 sign and relative strength of modulation for each neuron depending on the similarity of its preferred  
205 direction  $\phi_i$  to the attended direction  $\psi$ . We assume that  $h_i(\psi)$  most strongly enhances neurons with  
206 preferred directions equal to the attended direction and suppresses those with opposite preferred  
207 directions (Fig. 3B).

208 Because feature attention both increases and decreases different neurons' gain depending on  
209 their preferred direction relative to the attended direction of motion, it biases the population  
210 response towards the attended direction (Fig. 3D). Thus, unlike in the case of spatial attention the

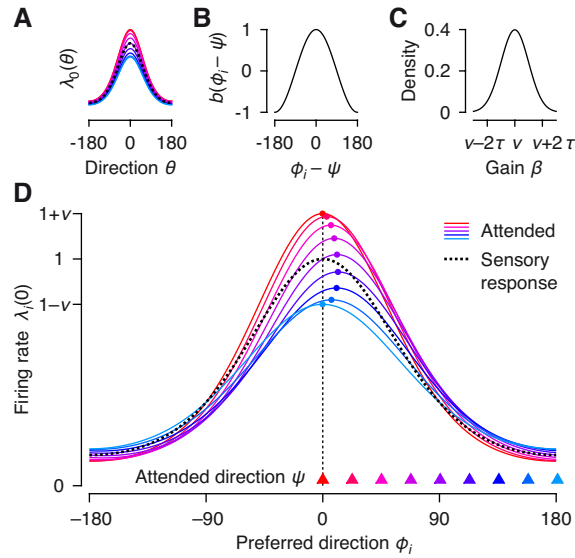

**Figure 3.** Model of feature attention. **A.** Tuning curve of a single neuron under sensory stimulation (black dotted) and with feature attention directed to different directions ranging from preferred (red) to null (blue). Note that the entire tuning curve of the neuron is gain-modulated and the modulation does not depend on the stimulus  $\theta$ . **B.** The gain of a neuron depends on which direction of motion  $\psi$  is attended relative to the neuron's preferred direction  $\phi_i$ . **C.** Distribution of gain ( $\beta$ ) fluctuations. A Gaussian is shown for illustration purposes; the analysis holds for any distribution with  $E[\beta] = \nu$  and  $\text{Var}[\beta] = \tau^2$ . **D.** Population response of a homogeneous population of neurons under sensory stimulation (black dotted) and with attention directed to different directions of motion ranging from  $0^\circ$  (red) to  $180^\circ$  (blue). The stimulus is  $\theta = 0$ . The curves show the average response of the neurons as a function of their preferred direction. Attending to a direction of motion biases the population response towards this attended stimulus. While each neuron's tuning curve is gain-modulated as a whole (panel A), the population response is no longer equal to the individual neurons' tuning curves, but instead sharpened/broadened and its peak is moved.

211 shape of the population response is no longer identical to that of the individual neuron's tuning  
 212 curve. We start by assuming that the subject always attends the same direction (i. e.  $\psi$  is constant)  
 213 and consider the effect of fluctuations in the strength of attention, that is the gain  $\beta$ . We will come  
 214 back to fluctuations in the attended direction below.

Similar to spatial attention, fluctuations in feature attention lead to overdispersion of the spike counts relative to a Poisson process (because rate variability is added).

$$E[y_i|\theta, \psi] = (1 + \nu h_i(\psi)) f_i(\theta) \quad (37)$$

$$\text{Var}[y_i|\theta, \psi] = (1 + \nu h_i(\psi)) f_i(\theta) + \tau^2 h_i^2(\psi) f_i^2(\theta), \quad (38)$$

215 where  $\nu = E[\beta]$  and  $\tau^2 = \text{Var}[\beta]$  are the mean and the variance of the feature attention gain,  
 216 respectively. The degree of overdispersion not only increases with the neuron's firing rate, but also  
 217 depends on the neuron's preferred direction relative to the attended direction (Fig. 4A). Inter-  
 218 estingly, spike counts are more overdispersed at the null direction than at the preferred direction  
 219 (Fig. 4A: compare blue vs. black and green vs. yellow). The Fano factor (variance/mean) is given  
 220 by

$$F[y_i|\theta, \psi] = 1 + \frac{\tau^2 h_i^2(\psi)}{(1 + \nu h_i(\psi))^2} E[y_i], \quad (39)$$

221 which is higher when  $h_i$  is negative than when it is positive. Neurons with preferred directions  
 222 orthogonal to the attended direction are not overdispersed since  $h_i = 0$ .

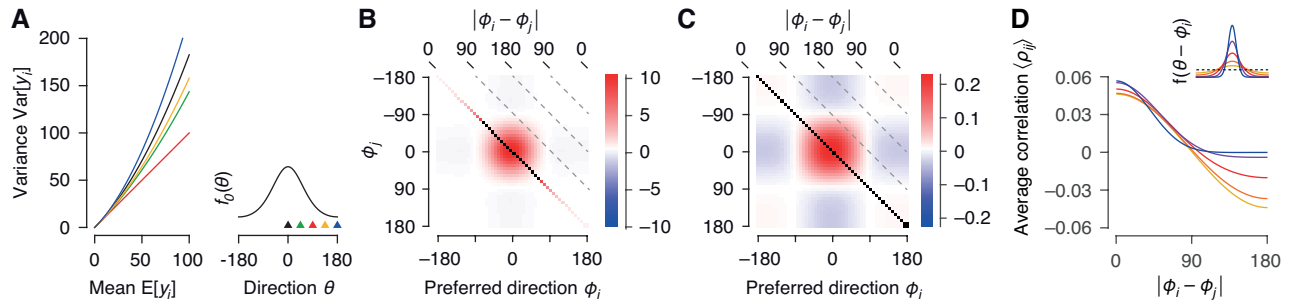

**Figure 4.** Effect of fluctuations in the feature attention gain on spike count statistics. Parameters here are:  $\psi = 0$ ,  $\nu = 0.1$ ,  $\tau^2 = 0.01$ . **A.** Spike count variance as a function of mean spike count. Colors indicate different attended directions relative to the neurons’ preferred direction ( $\phi_i - \psi$ ; illustrated by colored triangles in inset on the bottom right). **B.** Covariance matrix for stimulus  $\theta = 0$ . Neurons are ordered by preferred directions. Mean firing rate across the population: 20 spikes/s. **C.** As panel B, but the correlation coefficient matrix is shown. **D.** Dependence of spike count correlations on tuning similarity (difference of preferred directions). Fluctuations in feature attention induce limited range correlations irrespective of the shape of the tuning curve. The higher the baseline firing rate the stronger the negative correlations for neurons with opposite preferred directions. Inset: different tuning widths used.

223 As feature attention induces both increases as well as decreases in neuronal gain, the induced  
 224 correlation structure is different from that induced by spatial attention. For the covariances, we  
 225 obtain

$$\text{Cov}[y_i, y_j | \theta, \psi] = \tau^2 h_i(\psi) h_j(\psi) f_i(\theta) f_j(\theta) \quad i \neq j \quad (40)$$

226 The sign of the covariance is determined by the product of  $h_i$  and  $h_j$ , which depends on the  
 227 attended direction and the preferred directions of the two neurons (Fig. 4B). For two neurons  
 228 with identical preferred directions, the covariance is always positive while for two neurons with  
 229 orthogonal preferred directions it is always negative. For any pair of neurons in between, it can be  
 230 both positive and negative, depending on the stimulus (Fig. 4B). Again, the covariance matrix can  
 231 be written as diagonal plus rank one:

$$C = F + \tau^2 \mathbf{u} \mathbf{u}^T, \quad (41)$$

232 where  $F_{ii} = (1 + \nu h_i(\psi)) f_i(\theta)$  and  $u_i = h_i(\psi) f_i(\theta)$ .

233 As for spatial attention, averaging correlations over multiple stimulus conditions to represent  
 234 the correlation structure as a function of the neurons’ tuning similarity misses much of the under-  
 235 lying structure (Fig. 4C): spike count correlations are positively correlated with tuning similarity  
 236 (Fig. 4D), but the stimulus dependence (Fig. 4C) is again ignored. As before, the exact shape  
 237 of the decay depends on the tuning width: for narrow tuning curves, neurons with opposite pre-  
 238 ferred directions are only weakly anti-correlated, whereas for broad tuning curves, those neurons  
 239 are strongly anti-correlated (Fig. 4D, blue to red lines).

So far we have assumed that the attended direction of motion is constant and only the strength  
 of attention fluctuates from trial to trial. Now we turn to the case where the attended direction  
 fluctuates from trial to trial. We assume that, on average, the subject attends the correct direction,  
 i. e.  $E[\psi] = \theta$ , but with some variance  $\text{Var}[\psi] = q^2$ . We further assume the gain  $\beta$  is constant. In

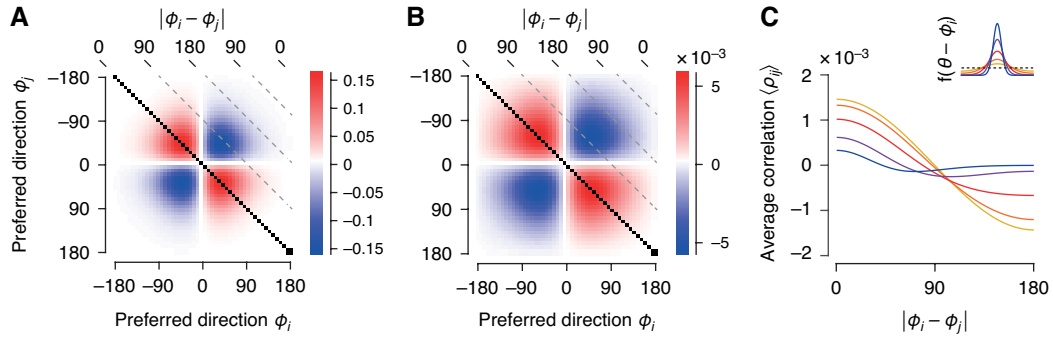

**Figure 5.** Effect of fluctuations in the attended direction on correlation structure. Parameters here are:  $E[\psi] = 0$ ,  $q = 10^\circ$ ,  $\beta = 0.1$ ,  $\theta = 0$ , mean firing rate across the population: 20 spikes/s. **A.** Covariance matrix. Neurons are ordered by preferred directions. **B.** As panel A, but the correlation coefficient matrix is shown. **C.** Dependence of spike count correlations on tuning similarity (difference of preferred directions). Fluctuations in the attended direction induce limited range correlations, whose shape depends on the width of the tuning curves. Inset: different tuning widths used.

this case, means and covariances of the observed spike counts are given by

$$E[y_i|\theta, \beta] = (1 + \beta h_i) f_i \quad (42)$$

$$\text{Cov}[y_i, y_j|\theta, \beta] = \delta_{ij}(1 + \beta h_i) f_i + q^2 \beta^2 h'_i h'_j f_i f_j, \quad (43)$$

240 where  $h'_i = \frac{d}{d\psi} h_i$  and we have abbreviated  $h_i \equiv h_i(\theta)$  and  $f_i \equiv f_i(\theta)$ . As before, we can write the  
241 covariance matrix as diagonal plus rank one:

$$C = F + q^2 \mathbf{v} \mathbf{v}^T, \quad (44)$$

242 where  $F_{ii} = (1 + \beta h_i) f_i$  and  $v_i = \beta h'_i f_i$ . This pattern of correlations (Fig. 5) differs from those  
243 observed before for gain fluctuations in an important way: the sign of the correlation between two  
244 neurons depends only on whether their preferred directions are on the same side (both clockwise  
245 or counter-clockwise) of the stimulus direction or on different sides. As we will show more formally  
246 in the next section, this pattern of correlations is known as *differential correlations* (Moreno-  
247 Bote et al. 2014). Again, when plotted as a function of the difference of two neurons' preferred  
248 directions, the correlations exhibit the typical limited-range structure (Fig. 5C), except for very  
249 narrow tuning curves, where the correlations are minimal around pairs with orthogonal preferred  
250 directions (Fig. 5C, blue lines). Also note that these correlations are substantially weaker than  
251 those induced by gain fluctuations (Figs. 2, 4), despite a relatively wide distribution of attended  
252 directions (SD:  $10^\circ$ ).

### 253 3.3 Effect of attention-induced correlations on population coding

254 How interneuronal correlations affect the representational accuracy of neuronal populations has  
255 been a matter of immense interest (and debate) over the last years. Thus, we want to briefly consider  
256 how correlations induced by attentional fluctuations affect the coding accuracy of a population  
257 code.

258 Before doing so we need to make a choice: does the downstream readout have access to the state  
259 of attention or not? If it does, the picture is fairly simple: attentional fluctuations do not affect the  
260 readout accuracy, since the attentional state can be accounted for and there is no additional noise

261 compared with a scenario without attentional fluctuations. The only downside is a potentially  
262 more complex readout. In contrast, if we assume that the readout does not have access to the  
263 attentional state, the situation becomes more interesting. In this case the attentional fluctuations  
264 act like additional (internally generated) noise, which could impair the readout. In the following  
265 we consider this latter scenario.

266 To quantify the accuracy of a population code, we use the Fisher information (Kay 1993) with  
267 respect to direction of motion. The Fisher information is useful because it quantifies the amount  
268 of information in a population of neurons without assuming a specific decoder. For a population  
269 of independent neurons, the Fisher information is linear in the number of neurons.

270 We start by considering spatial attention. Since the gain is the same for all neurons, gain  
271 fluctuations should not affect the coding accuracy of the population with respect to the direction  
272 of the stimulus, which is encoded in the differential activation pattern of the neurons. This is  
273 indeed the case. The Fisher information of a population of Poisson neurons whose firing rates are  
274 modulated by a common gain with mean  $\mu$  is given by

$$J = \mu \sum_{i=1}^N \frac{f'_i(\theta)^2}{f_i(\theta)} - O(1) \approx J_0. \quad (45)$$

275 Thus, unobserved gain fluctuations reduce the information in the population only by a constant  
276 term (for derivation see Appendix). For reasonably large populations (e.g.  $N > 100$ ) this term  
277 can be neglected and the information is approximately equal to that of an independent population  
278 ( $J_0$ ). This result can be understood intuitively by considering the structure of the covariance  
279 matrix (Eq. 33): the dominant eigenvector points in the direction of the tuning function  $\mathbf{f}$ , which  
280 is orthogonal to changes in the stimulus,  $\mathbf{f}'$ . Therefore, gain fluctuations do not impair the readout  
281 of the direction of motion.

282 The same result holds for fluctuations in the feature attention gain, so long as the attended  
283 direction matches the one shown and does not fluctuate from trial to trial. A fluctuating gain  
284 sharpens and broadens the population hill from trial to trial, but leaves its peak unchanged. Again,  
285 the dominant eigenvector ( $u_i = h_i f_i$ , Eq. 40) points in a direction that is orthogonal to changes in  
286 the stimulus (details see Appendix).

287 The situation changes if the focus of attention (i. e. the attended direction) fluctuates from trial  
288 to trial or the attended direction does not match the one shown: since feature attention biases the  
289 population response towards the attended direction, such attentional fluctuations have the same  
290 effect as noise on the input [*differential correlations*, (Moreno-Bote et al. 2014)]. To illustrate this  
291 finding, we switch to a slightly modified and more specific response model than above. Assuming  
292  $f_i(\theta) = \exp(\kappa \cos(\theta - \phi_i))$  and  $h_i = \cos(\psi - \phi_i)$ , and noting that  $(1 + \beta h_i) \approx \exp(\beta h_i)$ , we can  
293 write the log-firing rate as

$$\log \lambda_i = \beta \cos(\psi - \phi_i) + \kappa \cos(\theta - \phi_i). \quad (46)$$

294 We can combine the two cosine terms and obtain:

$$\log \lambda_i = \gamma \cos(\theta + \Delta\theta - \phi_i) \quad (47)$$

where

$$\gamma = \sqrt{\kappa^2 + \beta^2 + 2\kappa\beta \cos(\psi - \theta)} \quad (48)$$

$$\Delta\theta = \arccos\left(\frac{\gamma^2 + \kappa^2 - \beta^2}{2\gamma\kappa}\right). \quad (49)$$

295 Thus, feature attention biases the population response away from the stimulus direction  $\theta$  towards  
296 the attended direction  $\psi$ . The magnitude of the bias  $\Delta\theta$  depends on both the strength of feature  
297 attention  $\beta$  and the attended direction  $\psi$ . Consequently, if  $\psi \neq \theta$  fluctuations in either the attended  
298 feature or the degree of feature attention have the same effect on the population response as variance  
299 of the stimulus direction that is shown, i. e. they induce differential correlations. This result can  
300 also be understood by considering the structure of the covariance matrix (Eq. 44): the dominant  
301 eigenvector  $v_i = h'_i f_i$  points in the same direction as changes in the stimulus,  $\mathbf{f}'$ . We can therefore  
302 approximate the Fisher information by (see Moreno-Bote et al. 2014)

$$J \approx \frac{J_0}{1 + \varepsilon J_0} \rightarrow \frac{1}{\varepsilon}, \quad (50)$$

303 where  $J_0$  is again the information in an independent population and  $\varepsilon = \text{Var}[\Delta\theta]$  depends on both  
304 the distribution of attended directions and the variance of the gain. In this case, the information  
305 in the population saturates at a finite value  $1/\varepsilon$  that depends only on the distribution of the  
306 attention signal and can be substantially lower than the limit imposed by the information in  
307 feedforward signal (see also Discussion). When the subject attends the correct direction on average  
308 (i. e.  $E[\psi] = \theta$ ) and the variance of the attended direction ( $\text{Var}[\psi]$ ) is small, we find

$$J \rightarrow \frac{(\kappa/\beta + 1)^2}{\text{Var}[\psi]}. \quad (51)$$

309 Thus, the saturation level depends on the strength ( $\beta$ ) of attention relative to the tuning width  
310 ( $\kappa$ ) and the variance in the attended direction.

### 311 3.4 Identifying attentional fluctuations in experimental data

312 We saw above that fluctuations in attentional state can introduce interesting patterns of cor-  
313 relations in neural activity, all of which are roughly consistent with the published literature on  
314 attention. However, as long as one considers only single neurons and pairwise statistics, any result  
315 can be consistent with many hypotheses. For instance, attentional fluctuations induce correlations  
316 that depend on firing rates (Fig. 2C), but the same result is also predicted by the thresholding non-  
317 linearity of neurons (Rocha et al. 2007) and therefore need not result from attentional fluctuations.  
318 Similarly, all types of attentional fluctuations considered above lead to correlations that decrease  
319 with the difference of two neurons' preferred directions (*limited range correlations*, Figs. 2E, 4D,  
320 5C), but this correlation structure can also arise from shared sensory noise (Shadlen and Newsome  
321 1998).

322 So how would one go about identifying attentional fluctuations in experimental data? Clearly,  
323 one has to consider the response patterns of simultaneously recorded populations of neurons rather  
324 than just pairwise correlations. In the following, we discuss some predictions our model makes for  
325 the structure of the neural population response.

326 A first approach suggested by our analyses above: we showed that in all cases we analyzed the  
327 covariance matrix induced by attentional fluctuations is diagonal plus rank one. Thus, attentional  
328 fluctuations are restricted to a low-dimensional subspace that could be identified from simultane-

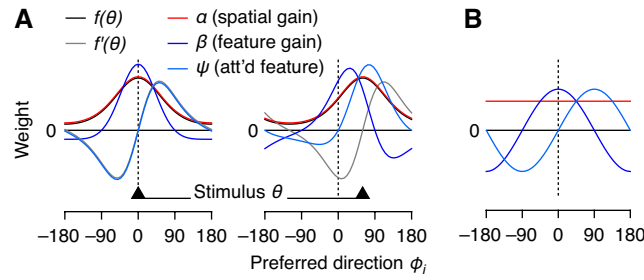

**Figure 6.** Identifying attentional fluctuations from variability in neuronal population activity. **A.** The subspace identified by Factor Analysis depends on the stimulus direction. Black triangles: stimulus direction (left:  $\theta = 0^\circ$ , right:  $\theta = 60^\circ$ ). Solid lines: basis functions corresponding to fluctuations in spatial attention gain (red), feature attention gain (dark blue), and attended direction (light blue); population tuning curve (black) and its derivative (gray). Horizontal dashed line: (average) attended direction. **B.** Principal components identified by Exponential Family PCA are independent of the stimulus since the log-link turns a multiplicative modulation into an additive offset. Colors as in panel A.

329 ously recorded neurons by *Factor Analysis*. However, the disadvantage of this approach is that the  
 330 low-dimensional subspace depends on the stimulus in a non-trivial way (Fig. 6A for  $\theta = 0^\circ$  [left]  
 331 and  $\theta = 60^\circ$  [right]; see also Eqs. 33, 40, 44). This stimulus dependence precludes pooling of data  
 332 over multiple stimulus conditions. Moreover, if the attended direction does not match the stimulus  
 333 direction, the major axes of variability do not peak at either direction, but somewhere in between  
 334 (Fig. 6A, blue lines in the right panel, where  $\psi = 0^\circ$  and  $\theta = 60^\circ$ ). Thus, it is non-trivial to recover  
 335 the quantities of interest for the experimenter – the attended feature (direction) and the degree of  
 336 attention allocated (the gain).

337 A model that could directly extract attentional gains (spatial and feature gain) and the attended  
 338 feature would be desirable. Fortunately, all three can be inferred from population activity in a  
 339 straightforward manner using methods such as *Exponential Family Principal Component Analysis*  
 340 (*E-PCA*) (Collins et al. 2001; Mohamed et al. 2009) or *Poisson Linear Dynamical Systems* (*PLDS*)  
 341 (Buesing et al. 2012; Macke et al. 2011). Similar to above (Eq. 46), we assume  $f_i(\theta) = \exp(\kappa_i \cos(\theta -$   
 342  $\phi_i) + \epsilon_i)$  and  $h_i = \cos(\psi - \phi_i)$  and write the log-firing rate as

$$\log \lambda_i = \alpha + \beta \cos(\psi - \phi_i) + \kappa_i \cos(\theta - \phi_i) + \epsilon_i, \quad (52)$$

343 which can be rewritten as a linear function of the attentional state and the stimulus:

$$\log \lambda_i = \alpha + \mathbf{k}_i^T \mathbf{b} + \kappa_i \mathbf{k}_i^T \mathbf{x} + \epsilon_i, \quad (53)$$

344 where  $\alpha$  and  $\mathbf{b} = \beta \cdot [\cos \psi, \sin \psi]^T$  represent the state of spatial and feature attention, respectively,  
 345  $\mathbf{x} = [\cos \theta, \sin \theta]^T$  is the stimulus,  $\mathbf{k}_i = [\cos \phi_i, \sin \phi_i]^T$  is the neuron's preferred direction,  $\kappa_i$  the  
 346 (inverse) tuning width, and  $\epsilon_i$  controls the mean firing rate. This model is a *Generalized Linear*  
 347 *Model (GLM)* with Poisson observations and  $\log(x)$  as the link function. Thus, E-PCA or PLDS  
 348 will recover the subspace corresponding to fluctuations in attentional state  $\{\alpha, \mathbf{b}\}$ . This subspace is  
 349 spanned by  $\mathbf{u}_i = [1, \cos \phi_i, \sin \phi_i]$  and independent of the stimulus (see Fig. 6B). The attentional  
 350 gains are  $\alpha$  and  $\beta = \|\mathbf{b}\|$ , while the attended direction is  $\psi = \angle \mathbf{b}$ .

### 3.5 A new view on the reduction of shared variability under attention

There is ample experimental evidence that attention fluctuates from trial to trial (Cohen and Maunsell 2010; Cohen and Maunsell 2011), and we showed in the previous sections that such fluctuations induce patterns of (correlated) variability that are highly consistent with the reported data on attention (Cohen and Maunsell 2009; Herrero et al. 2013; Mitchell et al. 2009). Interestingly, in our model, both the magnitude of overdispersion in single neurons' spike counts and the average level of correlations are determined by the variance of the attentional gain ( $\sigma^2 = \text{Var}[g]$ ), but not by its average modulation ( $\mu = \text{E}[g]$ ). This observation suggests that the average attentional modulation ( $\mu$ ) between an attended and an unattended condition (which can be reliably measured based on average responses) does not predict the level of correlations in either condition, since the latter is controlled by an independent variable ( $\sigma^2$ ). Indeed, this is one of the central experimental findings: directing spatial attention to a certain location *increases* the average responses of neurons whose receptive fields represent this location, but reduces independent and shared variability among those neurons (Cohen and Maunsell 2009; Herrero et al. 2013; Mitchell et al. 2009). Thus, if our model is correct, then the data suggest that attention not only increases response gain, but also reduces the trial-to-trial variability of the gain.

This view of attention has important implications for the role of interneuronal correlations under attention. Recent studies (Cohen and Maunsell 2009; Mitchell et al. 2009) have argued that spatial attention improves behavioral performance primarily by reducing correlations. However, as we showed above, fluctuations of spatial attention do not affect the representational accuracy of the neuronal population. Therefore, under our model the experimentally observed reduction in correlations is irrelevant when reading out a neuronal population. The only difference that matters is the increase in gain.



## 4 Discussion

We find that a simple model of neuronal responses can account for a range of empirically observed phenomena relating attention, neuronal variability and coding properties of neuronal populations. Our model unites two central findings in the literature on attention, that attention acts as a multiplicative gain factor on neuronal responses (Maunsell and Treue 2006) and that attention fluctuates from trial-to-trial (Cohen and Maunsell 2010). The importance of the combined effects of these observations has not previously been fully appreciated. We show that such a model is sufficient to account for super-Poisson variability (see also Ecker and Tolias 2014; Goris et al. 2014) as well as a variety of pairwise correlation structures, most notably the limited-range structure and differential correlations (Abbott and Dayan 1999; Ecker et al. 2010; Moreno-Bote et al. 2014; Smith and Kohn 2008).

Our results argue that it is likely that a large fraction of variability in the neuronal response can be attributed to fluctuations in behaviorally relevant, internally-generated signals, such as attention, rather than shared noise (Ecker and Tolias 2014; Ecker et al. 2010, 2014; Goris et al. 2014; Nienborg and Cumming 2009). This view suggests the hypothesis that correlations that arise from such fluctuating signals generally should not impair coding of sensory information. We find that this assertion is true for the case of fluctuations in the magnitude of the gain. The Fisher information of our model population of neurons is not limited by fluctuations in the strength of attentional gain (i.e., is independent of the variance of the gain term), despite those fluctuations generating a limited-range correlation structure typically thought to impair coding.

However, theoretical work has shown that the effect of different patterns of correlations on the coding of sensory information is nuanced and can depend greatly on specific assumptions that are made regarding a variety of neuronal properties, such as the shapes of tuning curves in the population, subtle details of the assumed correlation structure, or different readouts (Abbott and Dayan 1999; Ecker et al. 2011; Josić et al. 2009; Shamir and Sompolinsky 2006; Sompolinsky et al. 2001; Wilke and Eurich 2002). The recent work of Moreno-Bote et al. (2014) has helped to clarify the problem of when and what types of correlation structures are detrimental to coding with their description of differential correlations, a specific pattern of correlation proportional to the product of the derivative of the tuning curves that leads to information saturation. Our model generates this pattern of correlated variability when the fluctuations in attention occur around a specific feature rather than a specific gain value. Thus, it is noteworthy that a model only slightly more complicated than typical Poisson spiking models can generate the diversity of correlation structures noted in the experimental and theoretical literature as being important for population coding.

In addition to offering a parsimonious account of neuronal variability and co-variability, our model has implications for how we should interpret the effect of attention as it relates to improvements in perceptual performance. Chiefly, if the reduction of correlations observed under attention is indeed due to a reduction of gain fluctuations – as our model would suggest – the reduction of correlations is irrelevant with respect to the coding accuracy of the population and cannot be the mechanism improving behavioral performance as suggested by recent experimental studies (Cohen and Maunsell 2009; Herrero et al. 2013; Mitchell et al. 2009).

Our model leads to a second interesting observation: It is likely that not only the attentional gain fluctuates from trial to trial, but also the attended feature itself. Such fluctuations introduce differential correlations, which indeed impair the readout (unless it has exact access to the attended feature). Thus, the attentional mechanism itself places a limit on how accurately a stimulus can be represented by a sensory population, and this limit can at least in principle be substantially lower than the amount of sensory information entering the brain through the eye. This insight may trigger the question: why, then, should there be an attentional mechanism in the first place? There

421 are a number of possible answers to this question.

422 First, we can think of attention as a prior. Using prior information to bias an estimate towards  
423 more likely solutions will on average improve the estimate. In situations where the stimulus is noisy  
424 and decisions have to be made fast, such a bias is most beneficial and outweighs the small extra  
425 noise added due to variability in the prior. Conversely, in situations where there is lots of sensory  
426 evidence, the full information content present in the eye is rarely necessary in real-world situations,  
427 and, therefore, the noise added due to attentional fluctuations does not matter either.

428 Second, it should be noted that for change-detection paradigms that are typically employed  
429 in attention experiments, the estimation framework that asks how well a stimulus value can be  
430 reconstructed (e. g. Fisher information) is not quite appropriate. In such tasks the subject never  
431 judges the *absolute* direction (or any other feature) of the stimulus, but instead has to detect a small  
432 change, that is the difference between two subsequent stimuli. In this case any errors introduced  
433 due to fluctuations in the attended direction cancel out, since they affect both stimuli roughly  
434 equally, at least so long as attentional fluctuations occur at a timescale that is slow enough, such  
435 that the attentional state is approximately the same for both the pre- and post-change stimulus.

## References

- 436
- 437 Abbott, L. F. and P. Dayan (1999). “The Effect of Correlated Variability on the Accuracy of a  
438 Population Code”. *Neural Computation* 11.1, pp. 91–101.
- 439 Bair, W., E. Zohary, and W. T. Newsome (2001). “Correlated Firing in Macaque Visual Area MT:  
440 Time Scales and Relationship to Behavior”. *The Journal of Neuroscience* 21.5, pp. 1676–1697.
- 441 Britten, K. H. et al. (1993). “Responses of neurons in macaque MT to stochastic motion signals”.  
442 *Visual Neuroscience* 10.06, pp. 1157–1169.
- 443 Buesing, L., J. H. Macke, and M. Sahani (2012). “Learning stable, regularised latent models of  
444 neural population dynamics”. *Network: Computation in Neural Systems* 23.1-2, pp. 24–47.
- 445 Cohen, M. R. and J. H. R. Maunsell (2009). “Attention improves performance primarily by reducing  
446 interneuronal correlations”. *Nature Neuroscience* 12.12, pp. 1594–1600.
- 447 Cohen, M. R. and J. H. R. Maunsell (2010). “A Neuronal Population Measure of Attention Predicts  
448 Behavioral Performance on Individual Trials”. *The Journal of Neuroscience* 30.45, pp. 15241–  
449 15253.
- 450 Cohen, M. R. and J. H. Maunsell (2011). “Using Neuronal Populations to Study the Mechanisms  
451 Underlying Spatial and Feature Attention”. *Neuron* 70.6, pp. 1192–1204.
- 452 Collins, M., S. Dasgupta, and R. E. Schapire (2001). “A generalization of principal components  
453 analysis to the exponential family”. In: *Advances in neural information processing systems*,  
454 pp. 617–624.
- 455 Dean, A. F. (1981). “The variability of discharge of simple cells in the cat striate cortex”. en.  
456 *Experimental Brain Research* 44.4, pp. 437–440.
- 457 Ecker, A. S. and A. S. Tolias (2014). “Is there signal in the noise?” en. *Nature Neuroscience* 17.6,  
458 pp. 750–751.
- 459 Ecker, A. S. et al. (2010). “Decorrelated Neuronal Firing in Cortical Microcircuits”. *Science* 327.5965,  
460 pp. 584–587.
- 461 Ecker, A. S. et al. (2011). “The Effect of Noise Correlations in Populations of Diversely Tuned  
462 Neurons”. *The Journal of Neuroscience* 31.40, pp. 14272–14283.
- 463 Ecker, A. S. et al. (2012). “The correlation structure induced by fluctuations in attention”. In:  
464 *Cosyne Abstracts*, pp. III–46.
- 465 Ecker, A. S. et al. (2014). “State dependence of noise correlations in macaque primary visual  
466 cortex”. *Neuron* 82.1, pp. 235–248.
- 467 Goris, R. L. T., J. A. Movshon, and E. P. Simoncelli (2014). “Partitioning neuronal variability”.  
468 en. *Nature Neuroscience* 17.6, pp. 858–865.
- 469 Herrero, J. et al. (2013). “Attention-Induced Variance and Noise Correlation Reduction in Macaque  
470 V1 Is Mediated by NMDA Receptors”. *Neuron* 78.4, pp. 729–739.
- 471 Josić, K. et al. (2009). “Stimulus-Dependent Correlations and Population Codes”. *Neural Compu-*  
472 *tation* 21.10, pp. 2774–2804.
- 473 Kay, S. M. (1993). *Fundamentals of Statistical Signal Processing, Volume I: Estimation Theory*.  
474 1st ed. Prentice Hall.
- 475 Macke, J. H. et al. (2011). “Empirical models of spiking in neural populations”. *Advances in neural*  
476 *information processing systems* 24, p. 13501358.
- 477 Maunsell, J. H. and S. Treue (2006). “Feature-based attention in visual cortex”. *Trends in Neuro-*  
478 *sciences* 29.6, pp. 317–322.
- 479 Mitchell, J. F., K. A. Sundberg, and J. H. Reynolds (2009). “Spatial Attention Decorrelates Intrinsic  
480 Activity Fluctuations in Macaque Area V4”. *Neuron* 63.6, pp. 879–888.
- 481 Mohamed, S., Z. Ghahramani, and K. A. Heller (2009). “Bayesian exponential family PCA”. In:  
482 *Advances in Neural Information Processing Systems*, pp. 1089–1096.

- 483 Moreno-Bote, R. et al. (2014). “Information-limiting correlations”. en. *Nature Neuroscience* advance  
484 online publication.
- 485 Nienborg, H. and B. G. Cumming (2009). “Decision-related activity in sensory neurons reflects  
486 more than a neuron’s causal effect”. *Nature* 459.7243, pp. 89–92.
- 487 Rabinowitz, N. et al. (2015). “Modulators of V4 population activity under attention”. In: *Cosyne*  
488 *Abstracts*.
- 489 Reynolds, J. H. and L. Chelazzi (2004). “Attentional Modulation of Visual Processing”. *Annual*  
490 *Review of Neuroscience* 27.1, pp. 611–647.
- 491 Rocha, J. de la et al. (2007). “Correlation between neural spike trains increases with firing rate”.  
492 *Nature* 448.7155, pp. 802–806.
- 493 Shadlen, M. N. and W. T. Newsome (1998). “The Variable Discharge of Cortical Neurons: Impli-  
494 cations for Connectivity, Computation, and Information Coding”. *The Journal of Neuroscience*  
495 18.10, pp. 3870–3896.
- 496 Shamir, M. and H. Sompolinsky (2006). “Implications of Neuronal Diversity on Population Coding”.  
497 *Neural Computation* 18.8, pp. 1951–1986.
- 498 Smith, M. A. and A. Kohn (2008). “Spatial and Temporal Scales of Neuronal Correlation in Primary  
499 Visual Cortex”. *J. Neurosci.* 28.48, pp. 12591–12603.
- 500 Smith, M. A. and M. A. Sommer (2013). “Spatial and Temporal Scales of Neuronal Correlation in  
501 Visual Area V4”. en. *The Journal of Neuroscience* 33.12, pp. 5422–5432.
- 502 Sompolinsky, H. et al. (2001). “Population coding in neuronal systems with correlated noise”.  
503 *Physical Review E* 64.5, p. 051904.
- 504 Tolhurst, D. J., J. A. Movshon, and A. F. Dean (1983). “The statistical reliability of signals in  
505 single neurons in cat and monkey visual cortex”. *Vision research* 23.8, pp. 775–785.
- 506 Treue, S. and J. C. Martinez-Trujillo (1999). “Feature-based attention influences motion processing  
507 gain in macaque visual cortex”. *Nature* 399.6736, pp. 575–579.
- 508 Wilke, S. D. and C. W. Eurich (2002). “On the functional role of noise correlations in the nervous  
509 system”. *Neurocomputing* 44-46, pp. 1023–1028.
- 510 Zohary, E., M. N. Shadlen, and W. T. Newsome (1994). “Correlated neuronal discharge rate and  
511 its implications for psychophysical performance”. *Nature* 370.6485, pp. 140–143.
